# Supplementary material
Source: MDPI journal article supplement (https://www.mdpi.com/2673-8023/3/4/54)
Supplement: s1 [file s1]

# **Supplementary Materials**

## **Optimization of planar interdigitated microelectrode array for enhanced sensor responses**

Sakib Islam, Jie Wu,\*

Department of Electrical Engineering and Computer Science, The University of Tennessee, Knoxville,  
TN, 37996

\*To whom correspondence should be addressed. jwu10@utk.edu, **Tel:** (865) 974-5494

Part 1 Electric Potential, Temperature and Velocity Distribution

Page 2

Part 2 Simulation Verification

Pages 3

## PART 1: ELECTRIC POTENTIAL, TEMPERATURE AND VELOCITY DISTRIBUTION

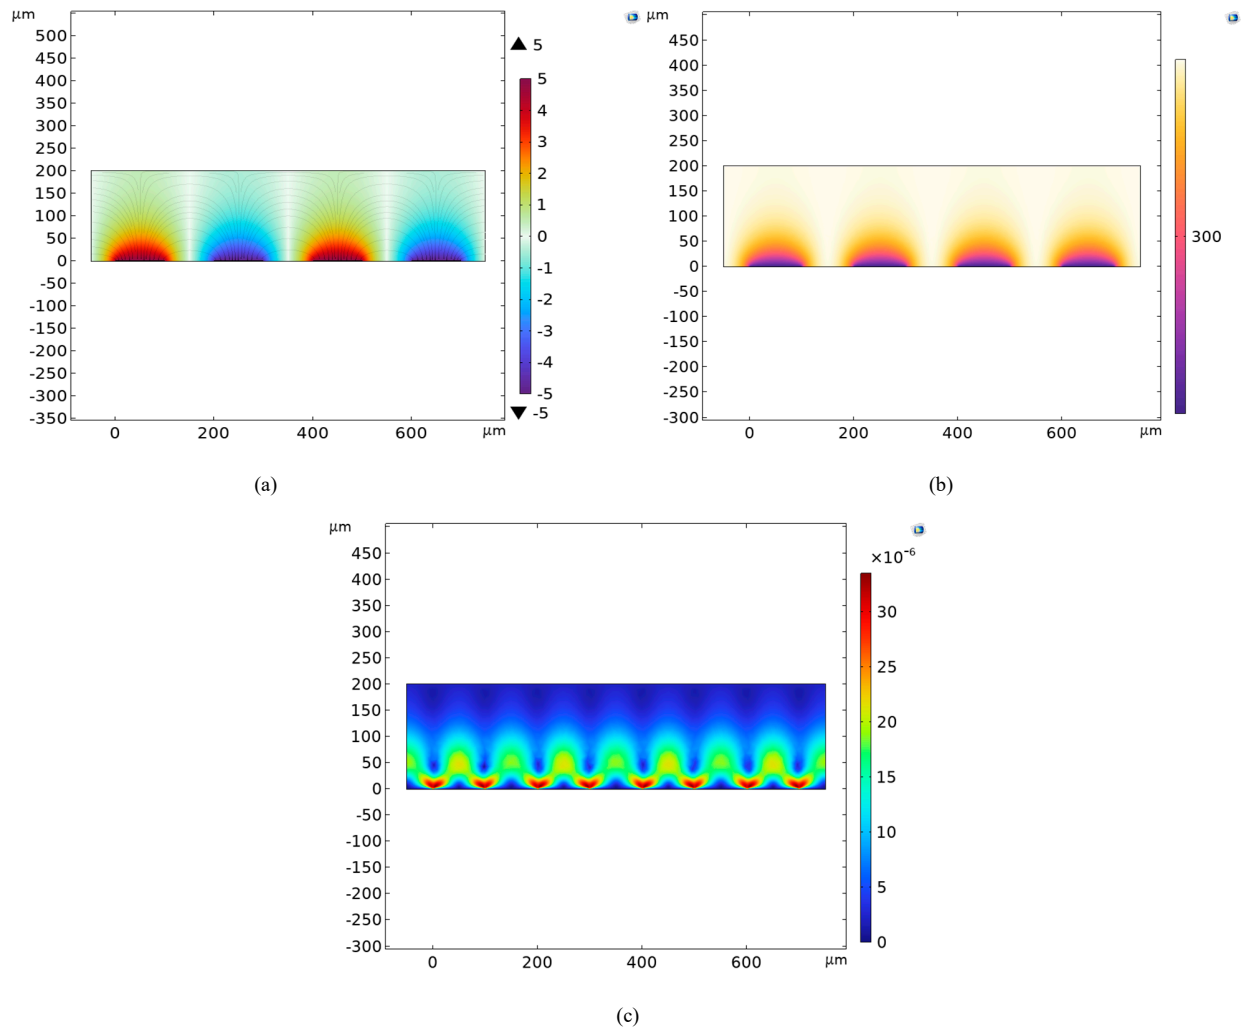

Figure S1. (a) Electric Potential Distribution, (b) Temperature Distribution, and (c) Velocity Distribution.

## PART 2 SIMULATION VERIFICATION

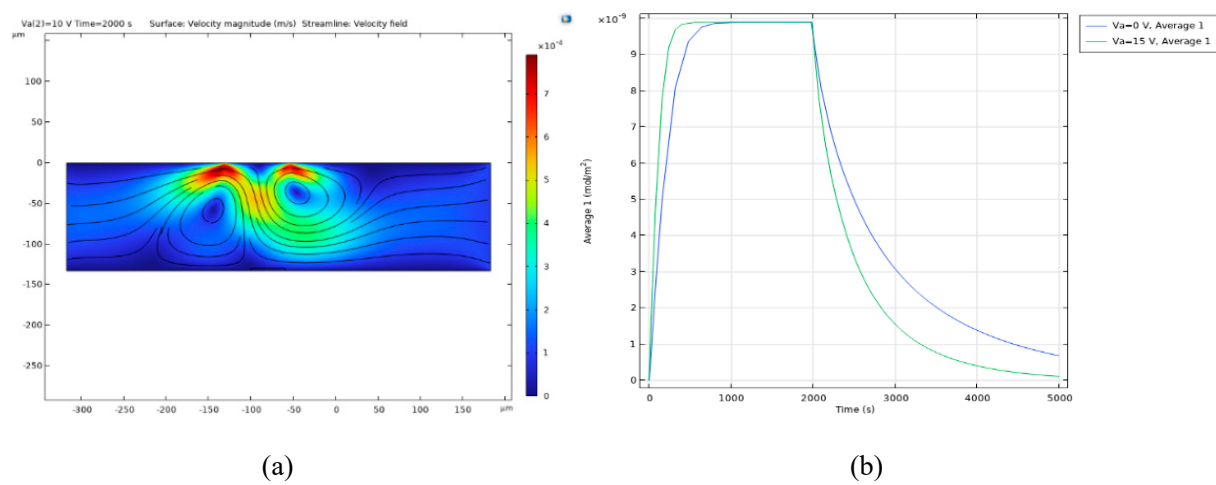

Figure S2: Replication of CRP binding reaction presented in figure 3(d) and 4(d) from "K.-R. Huang et al., "Simulation on binding efficiency of immunoassay for a biosensor with applying electrothermal effect."
